# Supplementary material for: Repulsive torques alone trigger crystallization of constant speed active particles
Source: Royal Society of Chemistry journal article supplement (doi:10.1039/d2sm00256f), 2022-01-01
Supplement: d2sm00256f1.pdf [file d2sm00256f1.pdf]

## Supplementary Information

Description of the Supplementary Videos:

Transient evolutions of the system at  $\rho = 1.03$ , with uniformly distributed initial positions  $\{\mathbf{r}_i\}$  and orientations  $\{\hat{\mathbf{p}}_i\}$ . Video durations are:  $25\tau$ .

**Video 1:** Gas state at  $\tau^{-1} = 0.4$ .

**Video 2:** Liquid state at  $\tau^{-1} = 10$ .

**Video 3:** Liquid state at  $\tau^{-1} = 40$ .

**Video 4:** Crystal state at  $\tau^{-1} = 200$ .
